# Supplementary material
Source: PubMed Central journal article supplement (PMC5322475)
Supplement: bi6b00888_si_001.pdf [file bi6b00888_si_001.pdf]

## **SUPPLEMENTARY MATERIAL**

### **Structural Analysis of Glycosylated Intact HIV-1 gp120-b12 Antibody**

#### **Complex using Hydroxyl Radical Protein Footprinting**

**Xiaoyan Li<sup>1†</sup>, Oliver C. Grant<sup>1†</sup>, Keigo Ito<sup>1</sup>, Aaron Wallace<sup>2</sup>, Shixia Wang<sup>2</sup>, Peng Zhao<sup>1</sup>,  
Lance Wells<sup>1</sup>, Shan Lu<sup>2</sup>, Robert J. Woods<sup>1</sup>, and Joshua S. Sharp<sup>3</sup>**

<sup>1</sup>Complex Carbohydrate Research Center, University of Georgia, Athens, GA, 30602, USA

<sup>2</sup>Department of Medicine, University of Massachusetts Medical School, Worcester, MA, 01605,  
USA

<sup>3</sup>Department of BioMolecular Sciences, University of Mississippi, University, MS 38677

<sup>†</sup>Authors contributed equally to the manuscript

Correspondence to: Joshua S. Sharp; email: [jsharp@olemiss.edu](mailto:jsharp@olemiss.edu)

Department of BioMolecular Sciences

P.O. Box 1848, University, MS 38677-1848

Phone: (662) 915-1758

Fax: (662) 915-5638

**Table S1**

| <b>Glycosylation Site Identified</b> | <b>% Occupancy</b> |
|--------------------------------------|--------------------|
| 88                                   | 100 %              |
| 135                                  | 76%                |
| 138                                  | 36%                |
| 141                                  | 25%                |
| 156                                  | 38%                |
| 160                                  | 100%               |
| 187                                  | 100%               |
| 188                                  | 41%                |
| 234                                  | 42%                |
| 241                                  | 56%                |
| 262                                  | 56%                |
| 276                                  | 85%                |
| 295                                  | 70%                |
| 301                                  | 62%                |
| 332                                  | 74%                |
| 339                                  | 69%                |
| 356                                  | 100%               |
| 362                                  | 81%                |
| 386                                  | 79%                |
| 392                                  | 79%                |
| 397                                  | 79%                |
| 406                                  | 79%                |
| 448                                  | 78%                |
| 463                                  | 100%               |

## Figure S1

### Alignments of gp120 sequences with available crystal structures to JRFL used by Modeller to generate a homology model

```
>P1;9B4C
structureX:9B4C:84:G :127:G :::
-----VVLENVTEHFNMWKNDMVEQMEDIISLWDQSLKPCVK
LTPLCV-----
-----
-----
-----
-----*

>P1;2B4C
structureX:2B4C:195:G :492:G :::
-----S
CDTSVITQACPKISFEPIPIHYCAPAGFAILKCNCKTFNGKGPCKNVSTVQCTHGIRPVVSTQLLLNGSLAEEVVIRSD
NFTNNAKTIIVQLKESVEINCTRPNQNRKSIHIGPGRAFYTTGEIIGDIRQAHCNISRAKWNNTLKQIVIKLREQFENK
TIV-FNHSSGGDPEIVMHSFNCGGEFFYCNSAQLFNSTWNNNTEGSNNTEGNTITLPCRICKQIINMWQEVGKAMYAPPPIR
GQIRCSSNITGLLLTRDGGINENGTEIFRPGGDMRDNRSELYKYKVVVKIE--*

>P1;4NCO
structureX:4NCO:44:A :493:A :::
--VWKDAETTLFCASDAKAYETEKHNWATHACVPTDPNPQEIHLENVTEEFNWKNNMVEQMHTDIISLWDQSLKPCVK
LTPLCVTLQC-----TNVTNNITDDM-RGELKNCSFNMTTELDRKKQKVYSLFYR-----YRLIN
CNTSAITQACPKVSFEPIPIHYCAPAGFAILKCKDKKFNNGTGPCPSVSTVQCTHGIRPVVSTQLLLNGSLAEEVVMIRSE
NITNNAKNILVQFNTPVQINCTRPNNNRKSIHIGPGRAFYATGDIIGDIRQAHCNVSKATWNETLGKVVVKLRKHFNGN
TIIRFANSSGGDLEVTTHSFNCGGEFFYCNTSGLFNSTWISNT-----SVNDSITLPCRICKQIINMWQRIGQAMYAPPPIQ
GVIRCVSNITGLLLTRDGGSTNSTTETFRPGGDMRDNRSELYKYKVVVKIEP-*

>P1;4R4H
structureX:4R4H:47:A :83:A :::
-----EATTLFCASDAKAYDTEVHNWATHACVPTDPNPQE-----
-----
-----
-----
-----*

>P1;3JWD
structureX:3JWD:42:A :83:A :::
VPVWKEATTLFCASDAKAYDTEVHNWATHACVPTDPNPQE-----
-----
-----
-----
-----*

>P1;4TVP
structureX:4TVP:126:G :132:G :::
----CVTLQCT-----
-----
-----
-----
-----*

>P1;4TVP
structureX:4TVP:150:G :194:G :::
-----M-RGELKNCSFNMTTELDRKKQKVYSLFYRLDVVQIN-----SNKEYRLI-
-----
-----
-----
-----*

>P1;4HPO
structureX:4HPO:167:P :181:P :::
-----DKKQKVHALFYKLDI-----
-----
-----
-----
-----*
```

>P1;JRFL  
sequence:JRFL:::::0.00:0.00  
VPVWKEATTLFCASDAKAYDTEVHNWVATHACVPTDPNPQEVVLENVTEHFNWKNMVEQMQEDIISLWDQSLKPCVK  
LTPLCVTLNCKDVNATNTNDSEGTMERGEIKNCSFNITTSIRDEVQKEYALFYKLDVVPI-----DNNNTSYRLIS  
CDTSVITQACPKISFEPIPIHYCAPAGFAILKCNDKTFNGKGPCKNVSTVQCTHGIRPVVSTQLLLNGSLAEEEVVIRSD  
NFTNNAKTIIVQLKESVEINCTRPNNNRKSIHIGPGRAFYTTGEIIGDIRQAHCNISRAKWNNTLQIIVIKLREQFENK  
TIV-FNHSSGGDPEIVMHSFNCGGEFFYCNSTQLFNSTWNNNTEGSNTEGNTITLPCRKQIINMWQEVGKAMYAPP  
IR  
GQIRCSSNITGLLLTRDGGINENGTEIFRPGGGDMRDNRSELYKYKVVKIEPL\*
